# Supplementary material for: Crystalline C60monolayers at the solid–organic solution interface
Source: Royal Society of Chemistry journal article supplement (doi:10.1039/b207656j), 2002-01-01
Supplement: b207656j.doc [file b207656j.doc]

# Supporting Information

The Au(111) surface has been visualized with STM (see image below). It exhibits atomically flat terraces with a size of a few hundreds of nanometers across. These crystals are proper supports for the growth of ordered architectures of fullerene.


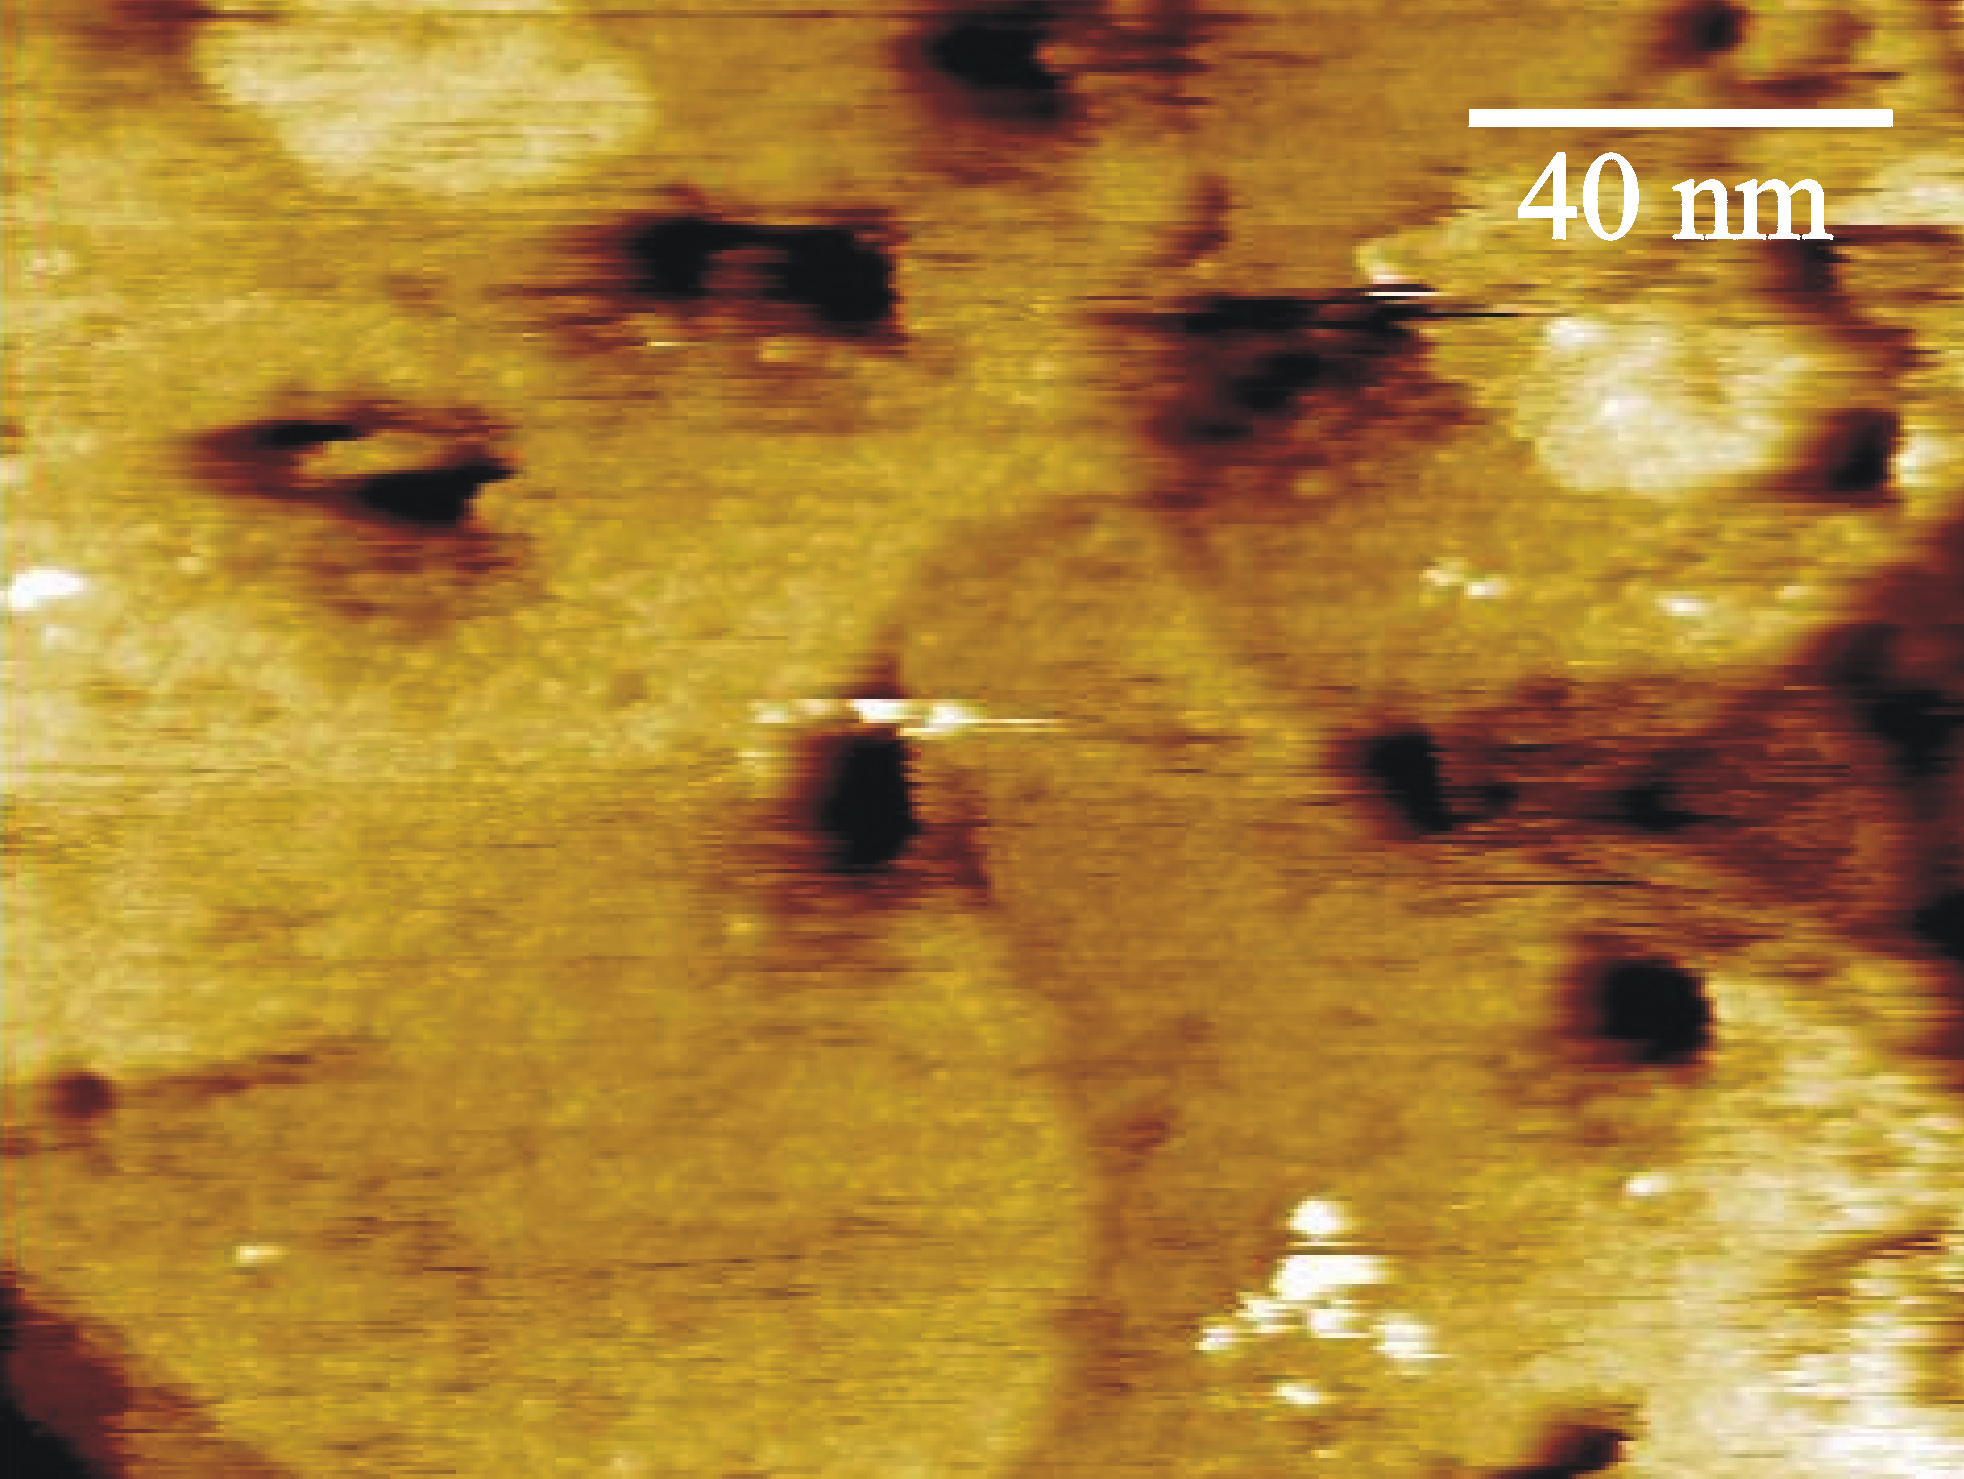


Constant current STM image of a Au(111) surface, onto which the C60 is adsorbed. By using slightly invasive tunneling parameters (tip bias=500 mV ; average tunneling current=200 pA) the structure of the bare substrate is visible. The small visualized roughness can be ascribed to the layer of C60 above. Height range: 8.5 nm.
